# Supplementary material
Source: PubMed Central journal article supplement (PMC8724314)
Supplement: 41422_2021_580_MOESM1_ESM.pdf [file 41422_2021_580_MOESM1_ESM.pdf]

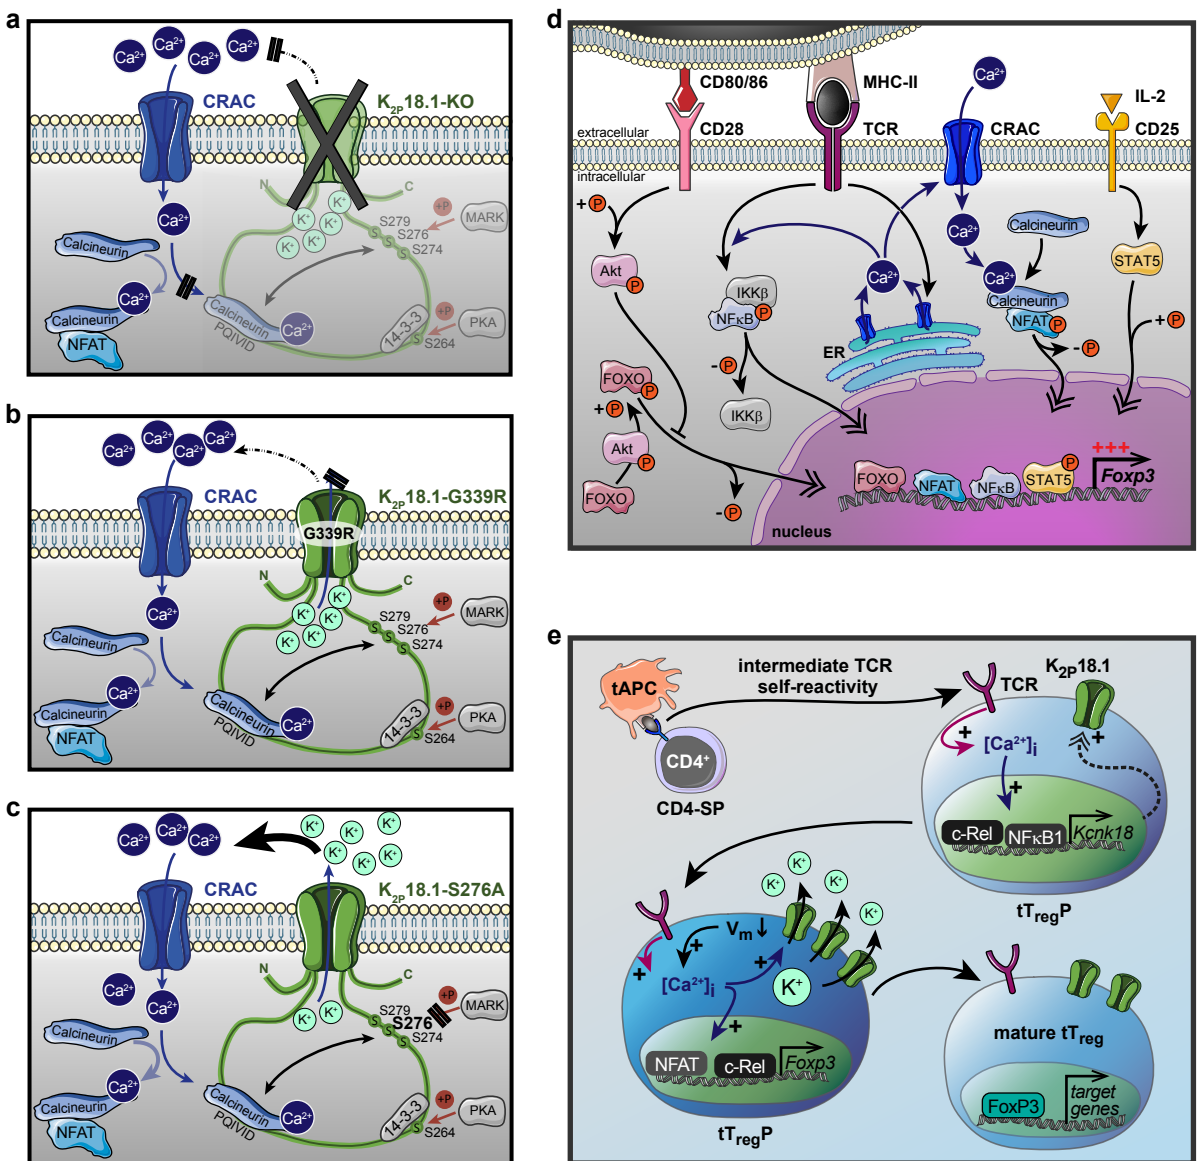

**Supplementary figure 1 *KCNK18* transgenic mouse models.** **a** Scheme of  $K_{2p}18.1$  function disrupted in full-knockout ( $Kcnk18^{-/-}$ ) mice. Calcineurin binds to the NFAT-like PQIVID motif in the intracellular loop of  $K_{2p}18.1$  and activates the channel by dephosphorylation of S-264 and the S-276 cluster. Phosphorylation of S-264 by PKA (protein kinase A) and S-276 by MARK (mammalian MAP/microtubule affinity-regulating kinase) restores the resting (inhibited) state of  $K_{2p}18.1$ . Docking of 14-3-3 adaptor protein to phosphorylated S-264 strengthens inhibition. **b** Scheme of G339R point mutation with abolished ion current through  $K_{2p}18.1$  but intact intracellular signalling. **c** Scheme of S276A point mutation with facilitated ion current through  $K_{2p}18.1$ . **d** Scheme of T cell receptor (TCR) and IL-2 dependent intracellular signalling cascades leading to FoxP3 expression. **e** Scheme of  $K_{2p}18.1$ -mediated  $t_{reg}$  development. T cell receptor (TCR) activation by antigens presented by thymic antigen-presenting cells (tAPC) drives fate decisions of multipotent CD4 single-positive thymocytes (CD4-SP) (step 1). TCR activation induces NF- $\kappa$ B signaling and thereby  $K_{2p}18.1$  upregulation in  $t_{reg}$  progenitors ( $t_{reg}^P$ ) (step 2).  $K_{2p}18.1$ -mediated K<sup>+</sup> efflux hyperpolarizes the membrane potential ( $V_m$ ) providing the driving force for prolonged high intracellular Ca<sup>2+</sup> levels, which in turn activate  $K_{2p}18.1$ -mediated ion-conductance and NF- $\kappa$ B signaling forming a positive feedback loop. High intracellular Ca<sup>2+</sup> levels further promote the translocation of NFAT and NF- $\kappa$ B related transcription factors into the nucleus (step 3). Those transcription factors induce and stabilize FoxP3 expression and thereby the development of mature  $t_{reg}$  (step 4).
