# Supplementary material
Source: PubMed Central journal article supplement (PMC8724314)
Supplement: 41422_2021_580_MOESM2_ESM.pdf [file 41422_2021_580_MOESM2_ESM.pdf]

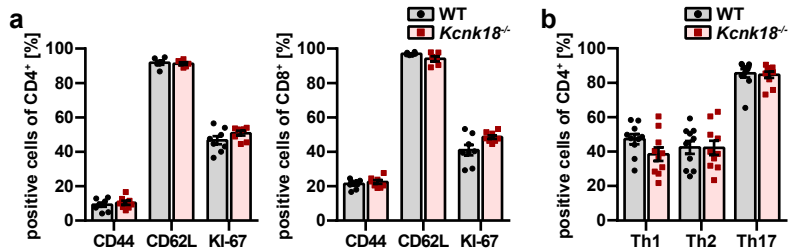

**Supplementary figure 2 Markers for T cell activation and *in vitro* Th cell induction show no differences in WT and *Kcnk18*<sup>-/-</sup> mice.** **a** Surface expression of indicated activation markers on CD4<sup>+</sup> and CD8<sup>+</sup> T<sub>conv</sub> isolated from WT and *Kcnk18*<sup>-/-</sup> mice. (n = 4-6). **b** *In vitro* Th1, Th2 and Th17 induction from naïve CD4<sup>+</sup>CD25<sup>-</sup>CD44<sup>-</sup> T cells in the presence of plate-bound anti-CD3 (2µg/ml), soluble anti-CD28 (4µg/ml) and different cytokines and antibodies driving Th cell differentiation. (n=10). Data are represented as mean ± SEM. \* p < 0.05, \*\* p < 0.01, \*\*\* p < 0.001.
