# Supplementary material
Source: PubMed Central journal article supplement (PMC8724314)
Supplement: 41422_2021_580_MOESM3_ESM.pdf [file 41422_2021_580_MOESM3_ESM.pdf]

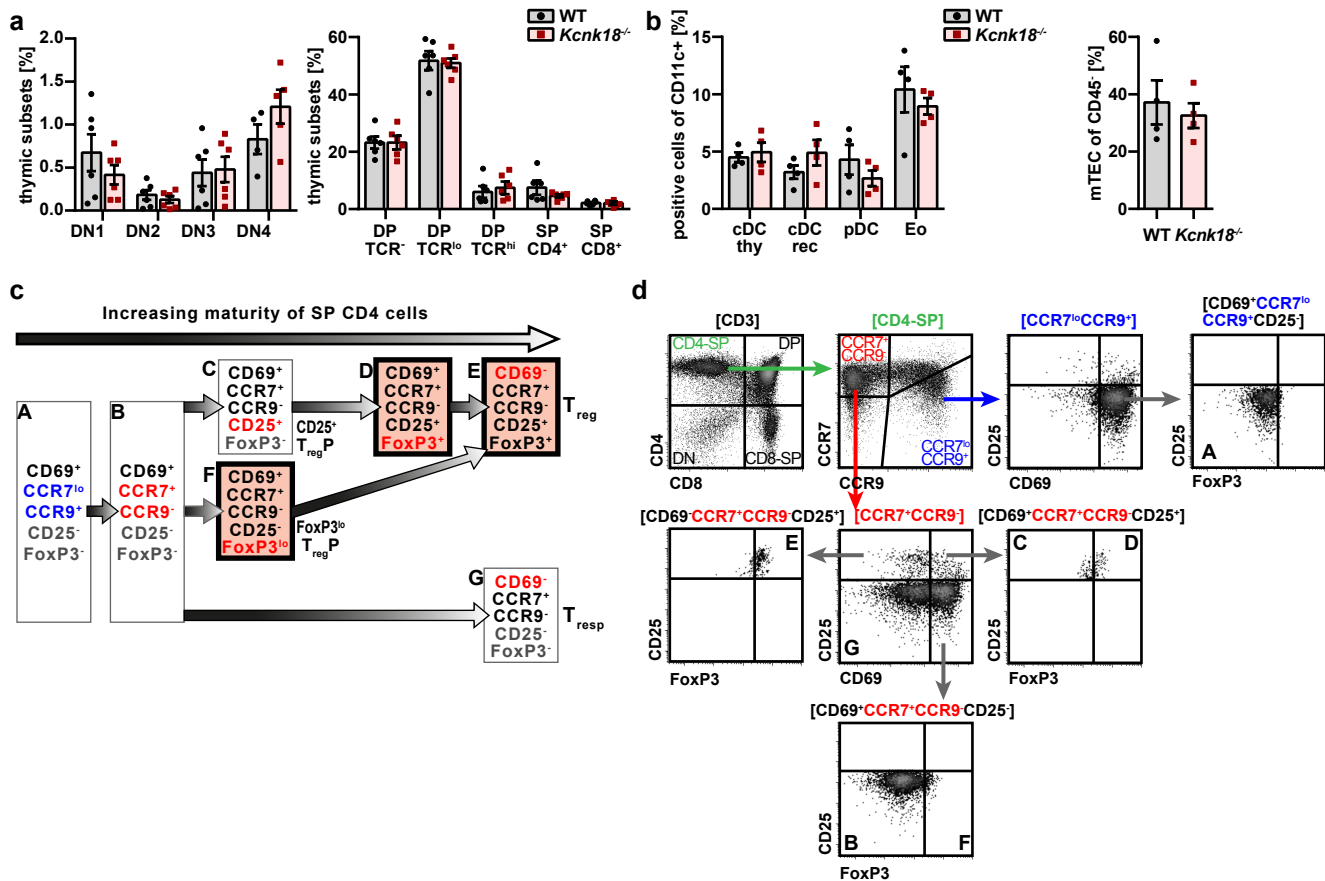

**Supplementary figure 3 Major thymocyte and thymic APC subsets are not altered in *Kcnk18*<sup>-/-</sup> mice. a**

Flow cytometry analysis of thymocyte subsets (DN = double negative (CD3<sup>+</sup>CD4<sup>-</sup>CD8<sup>-</sup>), stage 1: CD44<sup>+</sup>CD25<sup>-</sup>, stage 2: CD44<sup>+</sup>CD25<sup>+</sup>, stage 3: CD44<sup>-</sup>CD25<sup>+</sup>, stage 4 : CD44<sup>+</sup>CD25<sup>-</sup>, DP = double positive (CD3<sup>+</sup>CD4<sup>+</sup>CD8<sup>+</sup>), CD4<sup>+</sup>CD8<sup>+</sup>TCR<sup>-</sup>, CD4<sup>+</sup>CD8<sup>+</sup>TCR<sup>low</sup>, CD4<sup>+</sup>CD8<sup>+</sup>TCR<sup>high</sup>, SP = single positive: SP4 – CD4<sup>+</sup>CD8<sup>-</sup>TCR<sup>high</sup>, SP8 – CD4<sup>-</sup>CD8<sup>+</sup>TCR<sup>high</sup>, in the thymus isolated from WT and *Kcnk18*<sup>-/-</sup> mice. (n = 6)

**b** Frequencies of different antigen-presenting cell (APC) subsets (thymic resident cDC<sub>thy</sub> = CD11c<sup>hi</sup>CD11b<sup>-</sup>CD8a<sup>hi</sup>SIRPα<sup>-</sup>, recirculating cDC<sub>rec</sub> = CD11c<sup>hi</sup>CD11b<sup>+</sup>CD8a<sup>lo</sup>SIRPα<sup>+</sup>, plasmacytoid pDCs = CD11c<sup>int</sup>B220<sup>+</sup>, Eo = CD11c<sup>int</sup>, CD11b<sup>+</sup>, SIRPα<sup>+</sup>, mTEC = CD45<sup>+</sup>EpCAM<sup>+</sup>BP-1<sup>lo</sup>) in the thymus analysed by flow cytometry. (n = 4)

**c** Schematic overview of different tT<sub>reg</sub> developmental stages in the thymus identified by indicated marker combinations. Highlighted are developmental stages with reduced cell numbers in *Kcnk18*<sup>-/-</sup> compared to WT mice.

**d** Gating strategy for tT<sub>reg</sub> developmental stages shown in c, quadrants A-G correspond to the respective subsets in c. Data are represented as mean ± SEM. \* p < 0.05, \*\* p < 0.01, \*\*\* p < 0.001.
