# Supplementary material
Source: PubMed Central journal article supplement (PMC8724314)
Supplement: 41422_2021_580_MOESM4_ESM.pdf [file 41422_2021_580_MOESM4_ESM.pdf]

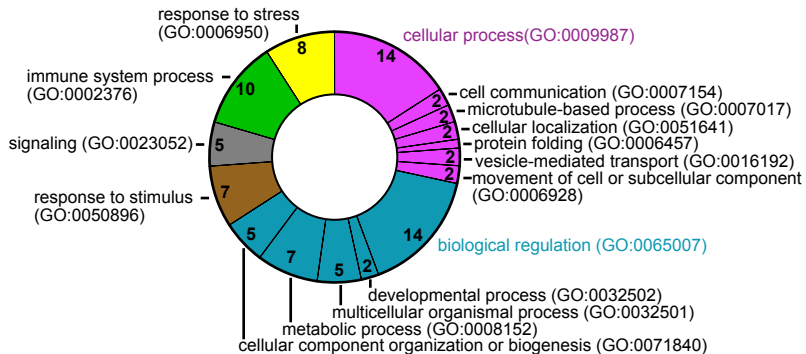

**Supplementary figure 4 GO-Term gene enrichment analysis of significantly differentially regulated genes (FDR) in *Kcnk18*<sup>G339R</sup> versus WT tT<sub>reg</sub>.** GO-Term gene enrichment analysis was performed using the PANTHER classification system. Numbers of differentially regulated genes assigned to the respective GO-Term are depicted within the pie-chart. The GO-Terms “cellular process (GO:0009987)” (purple) and “biological regulation (GO:0065007)” (blue) were further sub classified.
