# Supplementary material
Source: PubMed Central journal article supplement (PMC8724314)
Supplement: 41422_2021_580_MOESM5_ESM.pdf [file 41422_2021_580_MOESM5_ESM.pdf]

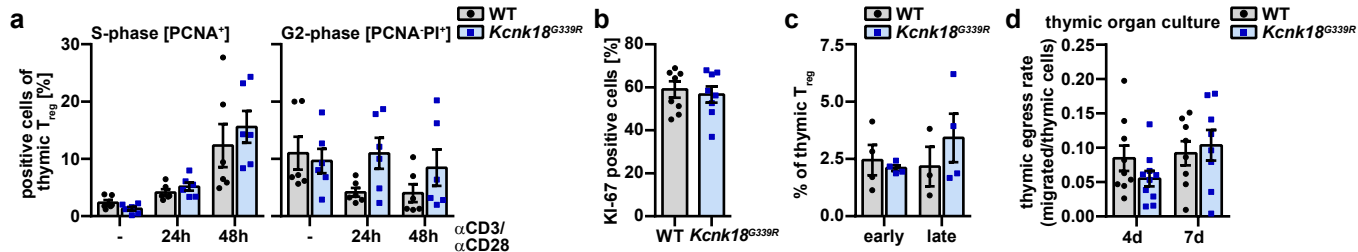

**Supplementary figure 5 Cell cycle and apoptosis of tT<sub>reg</sub> in *Kcnk18*<sup>G339R</sup> compared to WT mice.** **a** Cell cycle analysis in WT and *Kcnk18*<sup>G339R</sup> tT<sub>reg</sub> isolated from thymus. Frequencies of cells in S-(PCNA<sup>+</sup>PI<sup>-</sup>) and G2-(PCNA<sup>+</sup>PI<sup>+</sup>) phases were evaluated by flow cytometry. (n = 6) **b** Frequencies of early (Caspase3/7<sup>+</sup>FVD<sup>-</sup>) and late apoptotic (Caspase3/7<sup>+</sup>FVD<sup>+</sup>) tT<sub>reg</sub> isolated from WT and *Kcnk18*<sup>G339R</sup> thymus. (n = 6). **c** Proportion of KI67<sup>+</sup> tT<sub>reg</sub> in thymus of WT and *Kcnk18*<sup>G339R</sup>. (n = 8) **d** tT<sub>reg</sub> egression rates (emigrated cells/thymic cells) in WT and *Kcnk18*<sup>G339R</sup> thymus organ cultures after 4 and 7 days. (n = 8). Data are represented as mean ± SEM. \* p < 0.05, \*\* p < 0.01, \*\*\* p < 0.001.
