# Supplementary material
Source: PubMed Central journal article supplement (PMC8724314)
Supplement: 41422_2021_580_MOESM6_ESM.pdf [file 41422_2021_580_MOESM6_ESM.pdf]

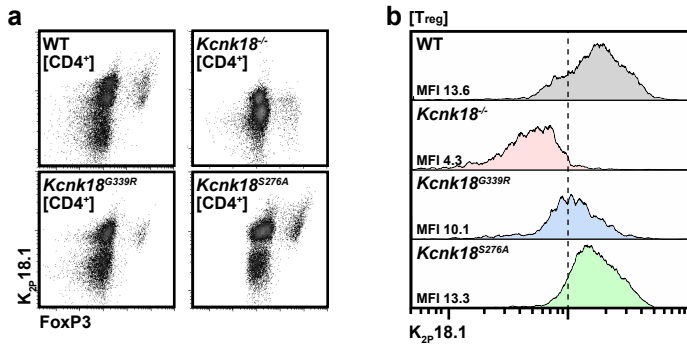

**Supplementary figure 6 Flow cytometry analysis of K<sub>2P</sub>18.1 expression.** **a** Representative flow cytometry dot blots of K<sub>2P</sub>18.1 and FoxP3 expression in WT, *Kcnk18*<sup>-/-</sup>, *Kcnk18*<sup>G339R</sup> and *Kcnk18*<sup>S276A</sup> CD4-SP thymocytes. **b** Representative flow cytometry histogram of K<sub>2P</sub>18.1 expression in WT (grey), *Kcnk18*<sup>-/-</sup> (red), *Kcnk18*<sup>G339R</sup> (blue) and *Kcnk18*<sup>S276A</sup> (green) tT<sub>reg</sub>.
