# Supplementary material
Source: PubMed Central journal article supplement (PMC8724314)
Supplement: 41422_2021_580_MOESM7_ESM.pdf [file 41422_2021_580_MOESM7_ESM.pdf]

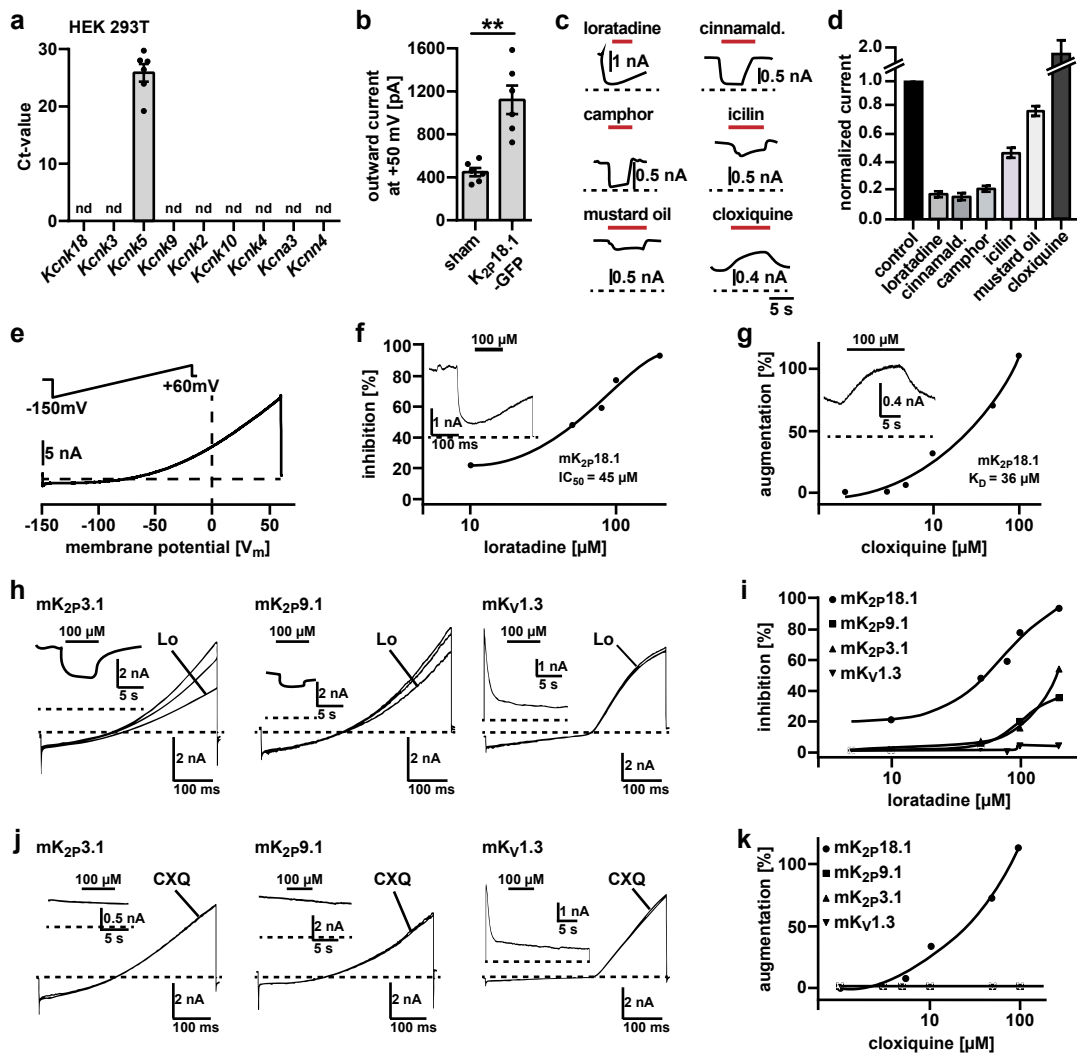

**Supplementary figure 7 Electrophysiological characterization of K<sub>2p</sub>18.1 pharmacological modulator.** **a** qPCR expression profile of different potassium channels in non-transfected HEK 293T cells. (n = 6) **b** Whole cell patch clamp recordings of potassium outward currents in K<sub>2p</sub>18.1-GFP transfected HEK 293T cells at a membrane potential of +50 mV. (n = 6) **c** Representative recordings of K<sub>2p</sub>18.1 current measured at +35 mV after application of different modulators. **d** Quantification of maximal inhibition of modulators from (c) inhibition: loratadine (100 μM, n = 6), cinammaldehyde (3 mM, n = 6), camphor (10 mM, n = 5), icilin (50 μM, n = 9) and mustard oil (10 mM, n = 10); activation: cloxiquine (100 μM, n = 6). **e** Voltage ramp protocols from -150 mV to +60 mV were used to evoke potassium outward currents. **f** Dose response curve of inhibition in K<sub>2p</sub>18.1-GFP transfected HEK 293T cells treated with increasing concentrations of loratadine as indicated, IC<sub>50</sub> = concentration of 50% maximal inhibition. (n = 3, each concentration) **g** Dose response curve of activation in K<sub>2p</sub>18.1-GFP transfected HEK 293T cells treated with increasing concentrations of cloxiquine as indicated, (n = 3, each concentration). Ramp recordings of outward currents from transfected HEK 293T cells with the indicated potassium channels after application of different loratadine and cloxiquine concentrations as indicated: Representative current traces with application of 50 μM and 100 μM loratadine **h** or cloxiquine **j** with the respective dose response curves **i** + **k** (n = 3 each). Data are represented as mean ± SEM. \* p < 0.05, \*\* p < 0.01, \*\*\* p < 0.001.
