# Supplementary material
Source: PubMed Central journal article supplement (PMC8724314)
Supplement: 41422_2021_580_MOESM8_ESM.pdf [file 41422_2021_580_MOESM8_ESM.pdf]

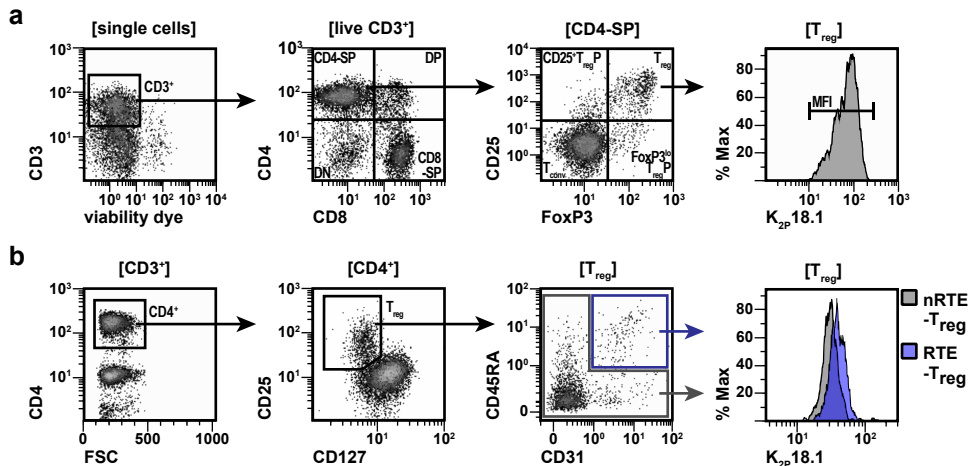

**Supplementary figure 8 Flow cytometry gating strategy a** Representative gating of mouse  $T_{reg}$  ( $CD3^+CD4^+CD8^-CD25^+FoxP3^+$ ) in WT thymocytes. Single cells were used for gating on live  $CD3^+$  T cells, followed by discrimination of  $CD4^+$  and  $CD8^+$ .  $CD4-SP$  were further gated for  $CD25$  and  $FoxP3$  to identify thymic  $CD4_{conv}$ ,  $T_{reg}$  and  $T_{reg}P$ . Expression levels of  $K_{2p}18.1$  has been assessed by measurements of the mean fluorescence intensity in the cell population of interest. **b** Gating of human RTE  $T_{reg}$  ( $CD4^+CD45RA^+CD31^+CD25^+CD127^{lo}$ ) and non-RTE  $T_{reg}$  ( $CD4^+CD45RA^-CD31^-CD25^+CD127^{lo}$ ,  $CD4^+CD45RA^+CD31^-CD25^+CD127^{lo}$ ,  $CD4^+CD45RA^-CD31^-CD25^+CD127^{lo}$ ).
