# Supplementary material
Source: PubMed Central journal article supplement (PMC8724314)
Supplement: 41422_2021_580_MOESM9_ESM.pdf [file 41422_2021_580_MOESM9_ESM.pdf]

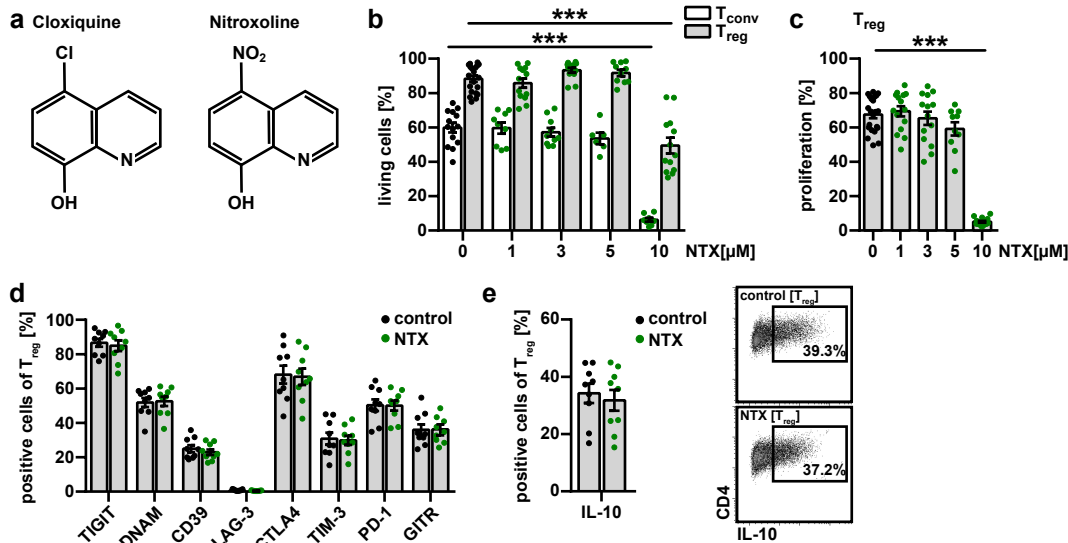

**Supplementary figure 9 Proliferation and function of human T<sub>reg</sub> under nitroxoline treatment *in vitro*.** **a** Chemical structure of cloxiquine and nitroxoline. **b** Quantification of living T cells under nitroxoline (NTX) treatment. CD4<sup>+</sup> T cells were isolated from healthy controls and treated with plate-bound anti-CD3 (1 $\mu$ g/ml), soluble anti-CD28 (2 $\mu$ g/ml) and the indicated NTX concentrations for 7d. Cells were then stained with AnnexinV and FVD and living T<sub>conv</sub> and T<sub>reg</sub> cells were quantified by flow cytometry as AnnexinV<sup>-</sup>FVD<sup>-</sup> cells. (n=14) **c** CFSE proliferation assay of sorted human T<sub>reg</sub> (CD4<sup>+</sup>CD25<sup>hi</sup>CD127<sup>lo</sup>) isolated from healthy controls. T<sub>reg</sub> were stimulated with plate-bound anti-CD3 (1 $\mu$ g/ml), soluble anti-CD28 (2 $\mu$ g/ml) and indicated concentrations of nitroxoline (NTX) for 7d and analysed by flow cytometry. (n = 14) **d** Surface expression of indicated effector molecules on T<sub>reg</sub> isolated from healthy controls and stimulated with plate-bound anti-CD3 (1 $\mu$ g/ml), soluble anti-CD28 (2 $\mu$ g/ml) and xx  $\mu$ M nitroxoline (NTX) for 7d. (n = 9). **e** Intracellular cytokine staining for IL-10: MACS-isolated CD4<sup>+</sup> T cells were stimulated with plate-bound anti-CD3 (2.0  $\mu$ g/ml) and soluble anti-CD28 (4.0  $\mu$ g/ml) for 24h, then re-stimulated with leukocyte activation cocktail (LAC (0.5  $\mu$ l/ml), containing PMA, ionomycin and Brefeldin A) for 4h and analysed by flow cytometry. Left: bar graphs, right: representative dot plots. (n = 9). Data are represented as mean  $\pm$  SEM. \* p < 0.05, \*\* p < 0.01, \*\*\* p < 0.001
