# Supplementary material
Source: PubMed Central journal article supplement (PMC8724314)
Supplement: 41422_2021_580_MOESM10_ESM.pdf [file 41422_2021_580_MOESM10_ESM.pdf]

**Supplementary table 1 Putative transcription factor binding sites in the *Kcnk18* promoter region.** *Kcnk18* Entrez gene ID:332396 was used for transcription factor binding site analysis with ConSite.<sup>75</sup> Regions correspond to the 2 kb upstream sequence and 5`UTR. The indicated score depicts the sequence similarity to known transcription factor binding sites in JASPAR database.

| <b>Transcription Factor</b> | <b>Sequence</b> | <b>from-to</b> | <b>score [strand]</b>  |
|-----------------------------|-----------------|----------------|------------------------|
| <b>c-Fos / Jun</b>          | GTGATTAA        | 470-477        | 9.471 [+]              |
| <b>c-Fos / Jun</b>          | GTGATTAA        | 941-948        | 10.264 [+]             |
| <b>n-Myc</b>                | CACGTG          | 1241-1246      | 10.533 [+]             |
| <b>n-Myc</b>                | CACGTG          | 1550-1555      | 10.351 [+]             |
| <b>p65 /c-Rel</b>           | CAGAATTTCC      | 1612-1621      | 9.927 [+] / 7.686 [+]  |
| <b>p65</b>                  | CAGAGTTTCC      | 1642-1651      | 8.799 [+]              |
| <b>p65 /c-Rel</b>           | AGGGGTTTCC      | 1975-1984      | 10.053 [+] / 9.028 [+] |
| <b>NF-kappaB</b>            | GGGGTTTCCA      | 1976-1989      | 7.776 [+]              |
| <b>NF-kappaB</b>            | GGCAAGTTCC      | 2008-2017      | 7.763 [+]              |
| <b>RORalpha-1</b>           | TTCCAGGTCA      | 2014-2023      | 11.473 [+]             |
| <b>IRF-1</b>                | GAAACCGAAGCT    | 2190-2201      | 10.277 [+]             |
